# Supplementary material
Source: PubMed Central journal article supplement (PMC7231631)
Supplement: NIHMS1578301-supplement-Supplementary_Information.pdf [file NIHMS1578301-supplement-Supplementary_Information.pdf]

In the format provided by the authors and unedited.

# Glucose-responsive insulin patch for the regulation of blood glucose in mice and minipigs

Jicheng Yu<sup>1,2</sup>, Jinqiang Wang<sup>1,3,4</sup>, Yuqi Zhang<sup>1,2</sup>, Guojun Chen<sup>1,3,4</sup>, Weiwei Mao<sup>2</sup>, Yanqi Ye<sup>1,2</sup>, Anna R. Kahkoska<sup>5</sup>, John B. Buse<sup>5</sup>, Robert Langer <sup>6,7,8,9,10</sup> and Zhen Gu <sup>1,3,4,11,12\*</sup>

---

<sup>1</sup>Joint Department of Biomedical Engineering, University of North Carolina at Chapel Hill and North Carolina State University, Raleigh, NC, USA. <sup>2</sup>Zenomics Inc., Los Angeles, CA, USA. <sup>3</sup>Department of Bioengineering, University of California, Los Angeles, Los Angeles, CA, USA. <sup>4</sup>California NanoSystems Institute, University of California, Los Angeles, Los Angeles, CA, USA. <sup>5</sup>Department of Medicine, University of North Carolina School of Medicine, Chapel Hill, NC, USA. <sup>6</sup>Department of Chemical Engineering, Massachusetts Institute of Technology, Cambridge, MA, USA. <sup>7</sup>David H. Koch Institute for Integrative Cancer Research, Massachusetts Institute of Technology, Cambridge, MA, USA. <sup>8</sup>Department of Anesthesiology, Boston Children's Hospital, Boston, MA, USA. <sup>9</sup>Division of Health Science and Technology, Massachusetts Institute of Technology, Cambridge, MA, USA. <sup>10</sup>Institute for Medical Engineering and Science, Massachusetts Institute of Technology, Cambridge, MA, USA. <sup>11</sup>Jonsson Comprehensive Cancer Center, University of California, Los Angeles, Los Angeles, CA, USA. <sup>12</sup>Center for Minimally Invasive Therapeutics, University of California, Los Angeles, Los Angeles, CA, USA. \*e-mail: [guzhen@ucla.edu](mailto:guzhen@ucla.edu)

**Figure S1.** Mass spectrum analysis of the native insulin and insulin extracted from GR-MN.

**Figure S2.** Photographs of GR-MN with a 1:4 ratio of DMAEA to 3APBA pre-incubated and post-incubated in PBS with varying glucose concentrations for 1 h.

**Figure S3.** *In vitro* accumulated insulin release from the polymeric matrix with a ratio of DMAEA to 3APBA at a 1:1 ratio or a 1:20 ratio across different glucose concentrations at 37 °C.

**Figure S4.** Insulin release from the polymeric matrix with a 1:4 ratio of DMAEA to 3APBA under different pH values at 37 °C.

**Figure S5.** *In vitro* accumulated insulin release from the polymeric matrix with a ratio of DMAEA to 3APBA at a 1:3 ratio or a 1:5 ratio across different glucose concentrations at 37 °C.

**Figure S6.** Insulin release of the polymeric matrix with a 1:4 ratio of DMAEA to 3APBA as a function of glucose concentrations.

**Figure S7.** (a) PGLs in STZ-induced diabetic mice after treatment with GR-MN with a ratio of DMAEA to 3APBA at 1:3, 1:4 or 1:5. (b) *In vivo* intraperitoneal glucose tolerance test in diabetic mice at 4 h post-administration of GR-MN with a ratio of DMAEA to 3APBA at 1:3, 1:4 or 1:5 in comparison with the healthy control mice.

**Figure S8.** (a) PGLs in the STZ-induced diabetic mice after treatment with GR-MN with different insulin doses. (b) *In vivo* intraperitoneal glucose tolerance test in diabetic mice at 4 h post-administration of GR-MN with different insulin doses in comparison with healthy control mice.

**Figure S9.** Hematoxylin and eosin (H&E)-stained section of mouse skin pre- and post-treatment of GR-MN.

**Figure S10.** The daily glucose pattern of the healthy Göttingen minipig recorded by calibrated CGMS.

**Figure S11.** (a) PGLs in STZ-induced diabetic mice during a 48-hour consecutive administration of GR-MN. (b) PGLs in three STZ-induced diabetic minipigs during a 48-hour consecutive administration of GR-MN.

**Figure S12.** Porcine C-peptide levels in diabetic minipigs after an intravenous glucose challenge at 4 h post-administration of GR-MN.

**Figure S13.** The *in vivo* glucose-responsive insulin release promoted by intravenous glucose challenge at 4 h post-administration of GR-MN for multiple rounds in three individual experiments.

**Figure S14.** (a) Representative SEM image of the MN array after removal from the skin. (b) H&E-stained section indicates that insignificant fragments were found in the skin tissue after the removal of GR-MN.

**Figure S15.** H&E-stained section of minipig skin pre- and post-treatment of GR-MN.

**Table S1.** Leachable monomers from the GR-MN patch with  $20 \times 20$  array of microneedles.

**Table S2.** Pharmacokinetic parameters of insulin after administration of GR-MN, CR-MN, and subcutaneous injection on diabetic mice.

**Table S3.** The plasma glucose levels of diabetic pigs.

**Table S4.** Gradient HPLC method for NVP, 3APBA and EGDMA.

**Table S5.** Gradient HPLC method for DMAEA.

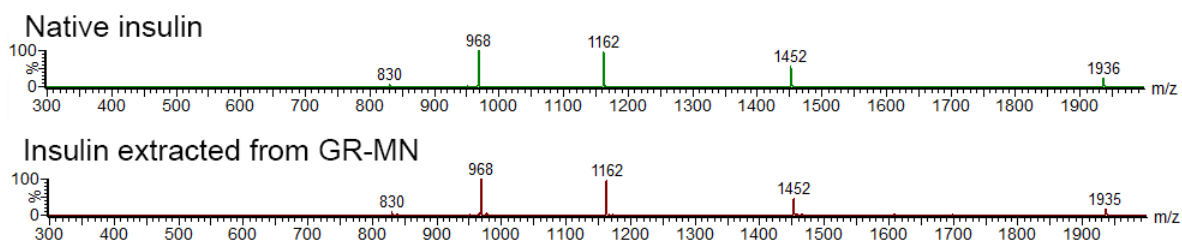

**Supplementary Figure 1.** Mass spectrum analysis of the native insulin and insulin extracted from GR-MN.

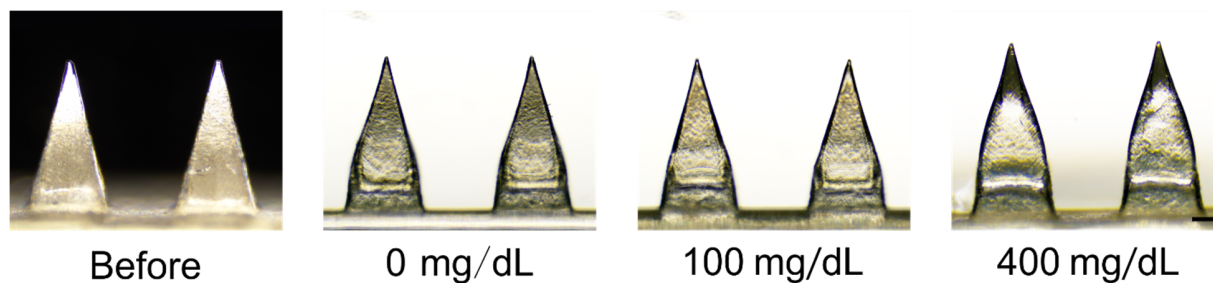

**Supplementary Figure 2.** Photographs of GR-MN with a 1:4 ratio of DMAEA to 3APBA pre-incubated and post-incubated in PBS with varying glucose concentrations for 1 h. Scale bar: 100  $\mu\text{m}$ .

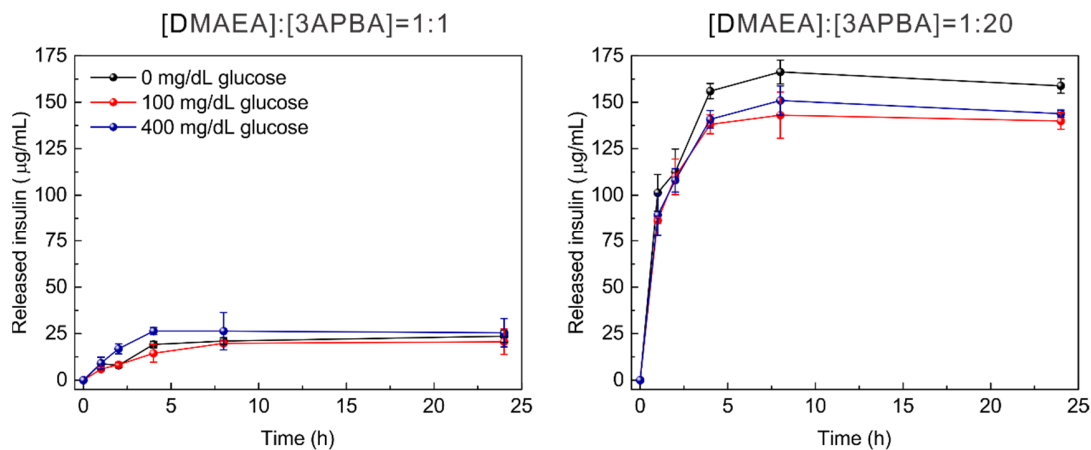

**Supplementary Figure 3.** *In vitro* accumulated insulin release from the polymeric matrix with a ratio of DMAEA to 3APBA at a 1:1 ratio (left) or a 1:20 ratio (right) across different glucose concentrations at 37 °C. Data are presented as mean ± s.d. ( $n=3$ ).

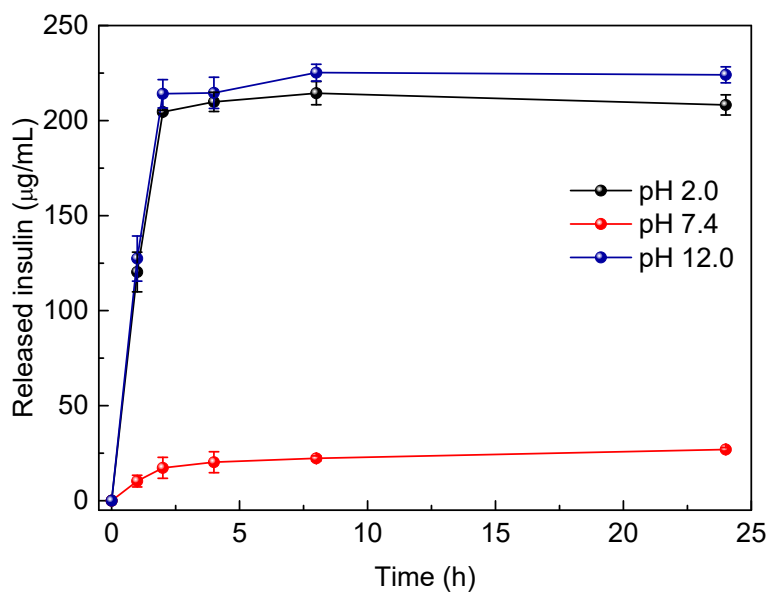

**Supplementary Figure 4.** Insulin release from the polymeric matrix with a 1:4 ratio of DMAEA to 3APBA under different pH values at 37 °C. Data are presented as mean ± s.d. ( $n=3$ ).

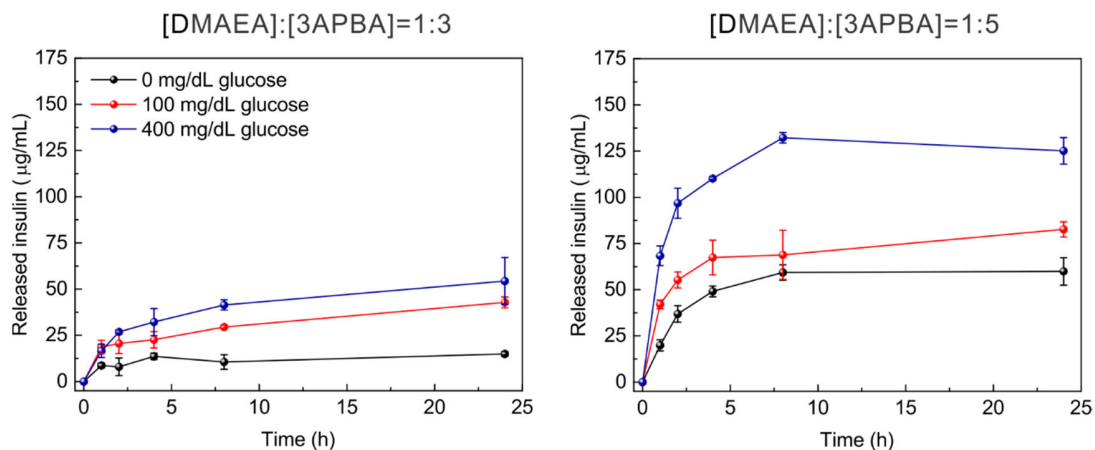

**Supplementary Figure 5.** *In vitro* accumulated insulin release from the polymeric matrix with a ratio of DMAEA to 3APBA at a 1:3 ratio (left) or a 1:5 ratio (right) across different glucose concentrations at 37 °C. Data are presented as mean ± s.d. ( $n=3$ ).

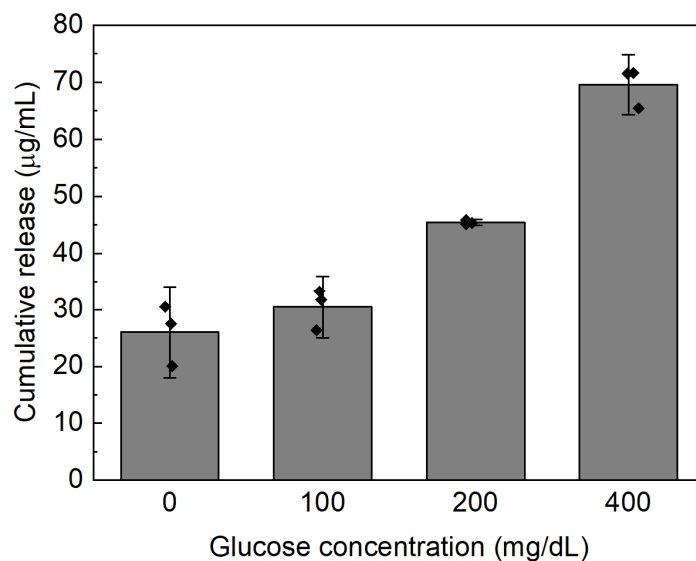

**Supplementary Figure 6.** Insulin release of the polymeric matrix with a 1:4 ratio of DMAEA to 3APBA as a function of glucose concentrations. Data are presented as mean ± s.d. ( $n=3$ ).

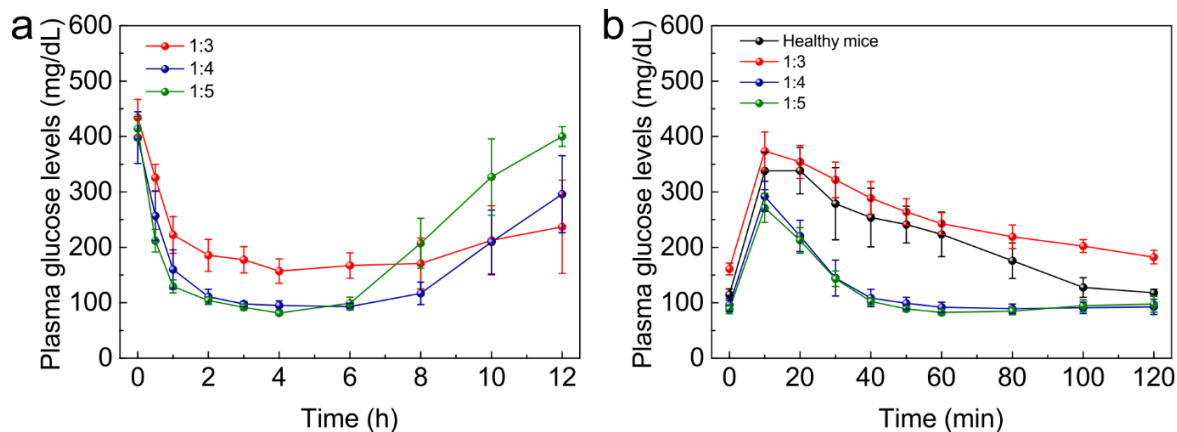

**Supplementary Figure 7.** (a) PGLs in STZ-induced diabetic mice after treatment with GR-MN with a ratio of DMAEA to 3APBA at 1:3, 1:4 or 1:5. Insulin dose: 0.5 mg. Data are presented as mean  $\pm$  s.d. ( $n=5$ ). (b) *In vivo* intraperitoneal glucose tolerance test in diabetic mice at 4 h post-administration of GR-MN with a ratio of DMAEA to 3APBA at 1:3, 1:4 or 1:5 in comparison with the healthy control mice. Glucose dose: 1.5 g/kg. Data are presented as mean  $\pm$  s.d. ( $n=5$ ).

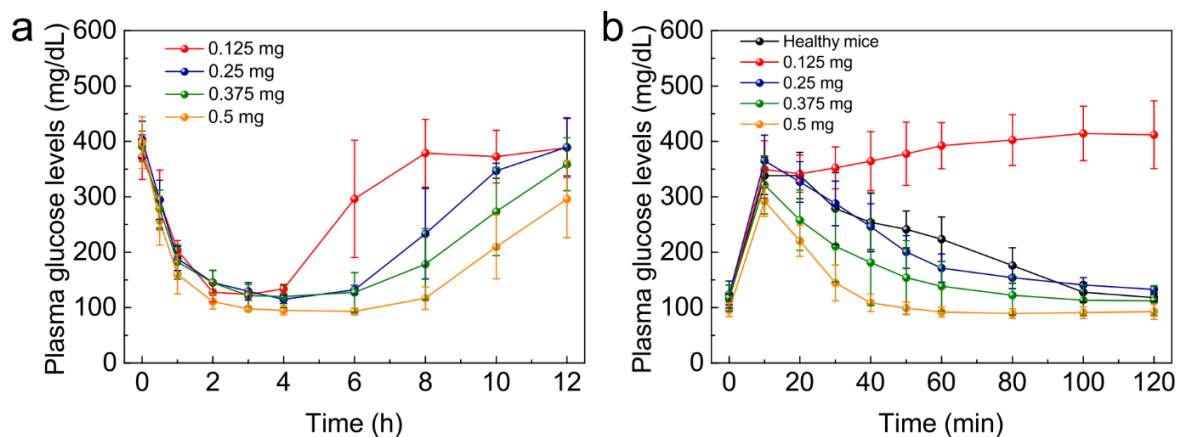

**Supplementary Figure 8.** (a) PGLs in the STZ-induced diabetic mice after treatment with GR-MN with different insulin doses. Data are presented as mean  $\pm$  s.d. ( $n=5$ ). (b) *In vivo* intraperitoneal glucose tolerance test in diabetic mice at 4 h post-administration of GR-MN with different insulin doses in comparison with healthy control mice. Glucose dose: 1.5 g/kg. Data are presented as mean  $\pm$  s.d. ( $n=5$ ).

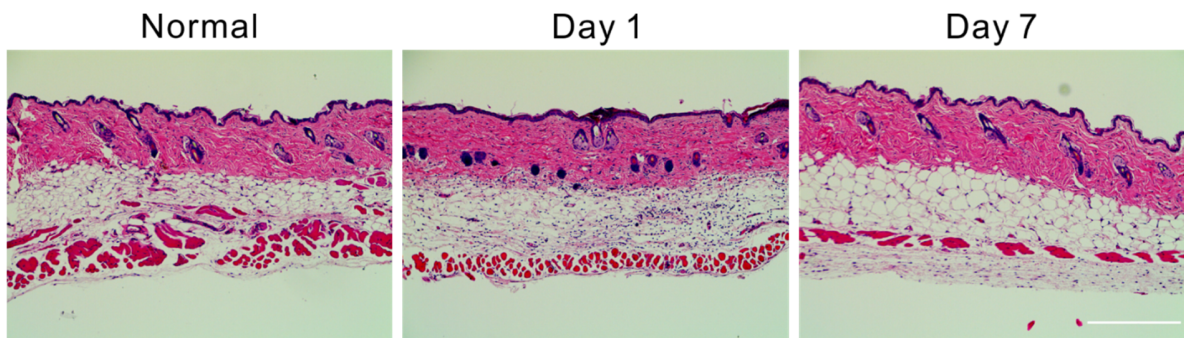

**Supplementary Figure 9.** Hematoxylin and eosin (H&E)-stained sections of mouse skin pre- and post-treatment of GR-MN. Scale bar: 400  $\mu\text{m}$ .

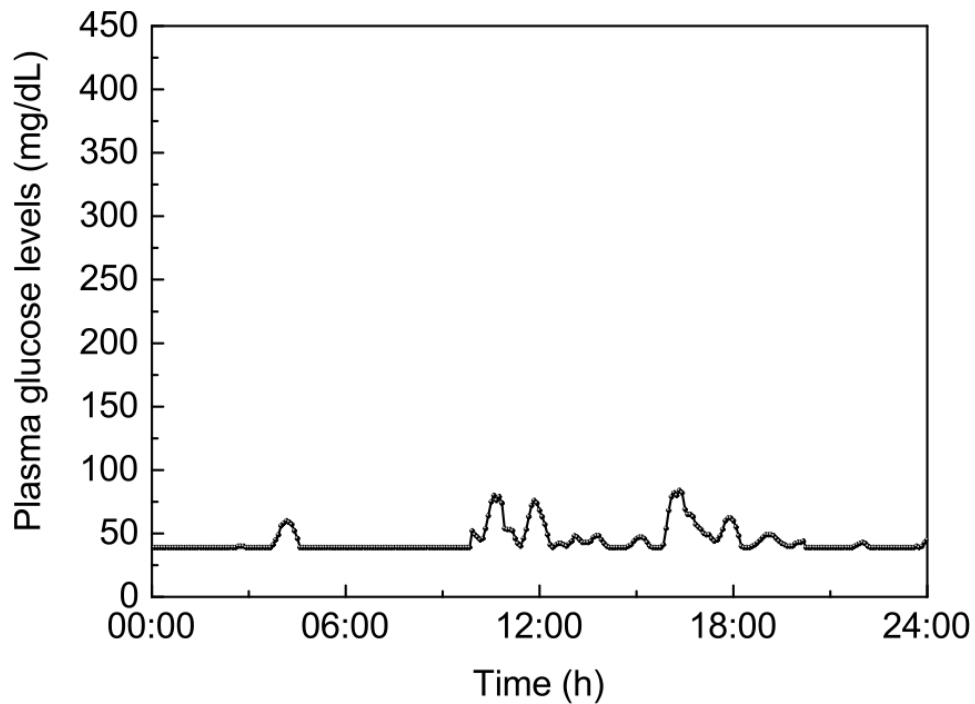

**Supplementary Figure 10.** The daily glucose pattern of the healthy Göttingen minipig recorded by calibrated CGMS.



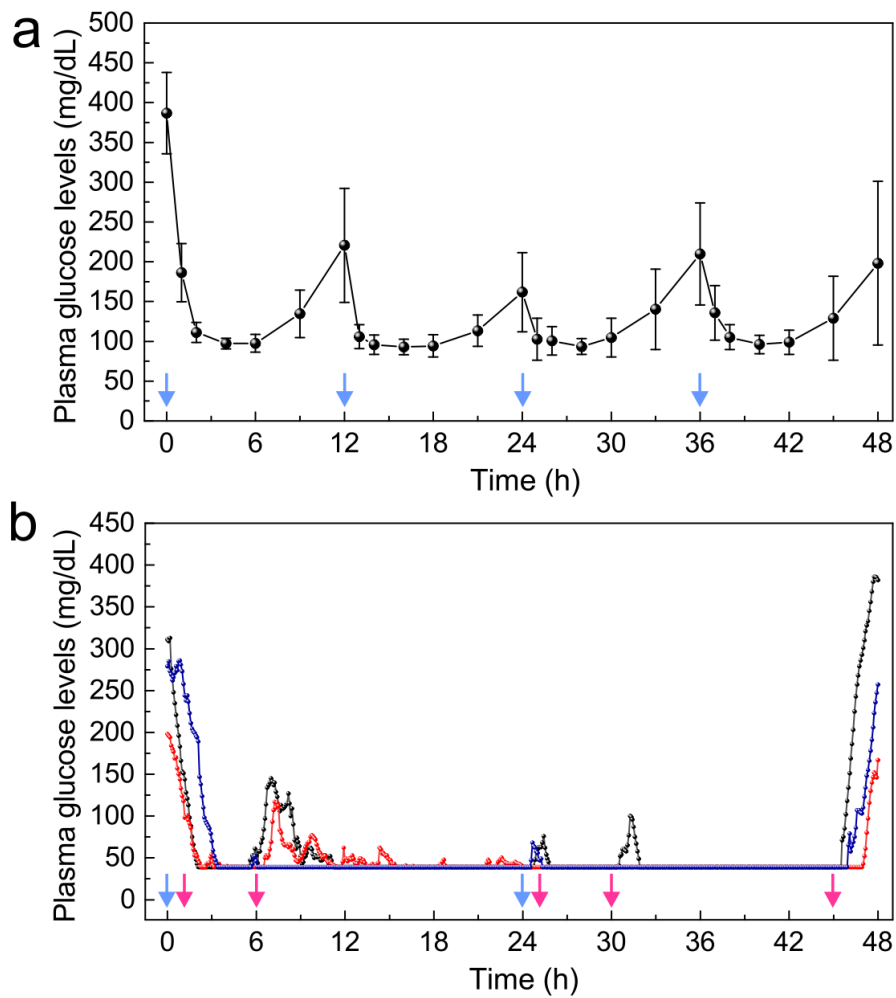

**Supplementary Figure 11. (a)** PGLs in STZ-induced diabetic mice during a 48-hour consecutive administration of GR-MN. Insulin dose: 0.5 mg. The blue arrows indicate the time points of MN administration. Data are presented as mean  $\pm$  s.d. ( $n=5$ ). **(b)** PGLs in three STZ-induced diabetic minipigs during a 48-hour consecutive administration of GR-MN. Insulin dose: 7 mg. The blue arrows indicate the time points of MN administration, and the pink arrows indicate the time points of feeding.

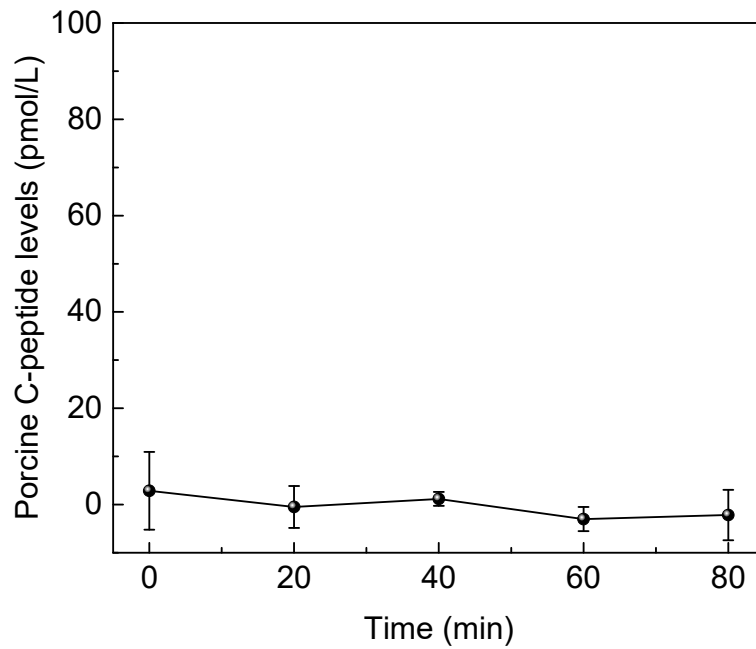

**Supplementary Figure 12.** Porcine C-peptide levels in diabetic minipigs after an intravenous glucose challenge at 4 h post-administration of GR-MN. Data are presented as mean  $\pm$  s.d. ( $n=3$ ).

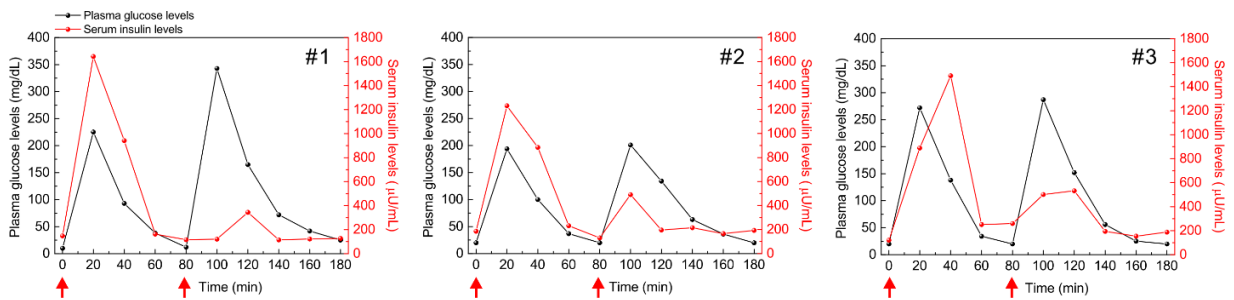

**Supplementary Figure 13.** The *in vivo* glucose-responsive insulin release promoted by intravenous glucose challenge at 4 h post-administration of GR-MN for multiple rounds in three individual experiments. Glucose dose for each round: 0.7 g/kg. The red arrows indicate the time points of glucose administration.

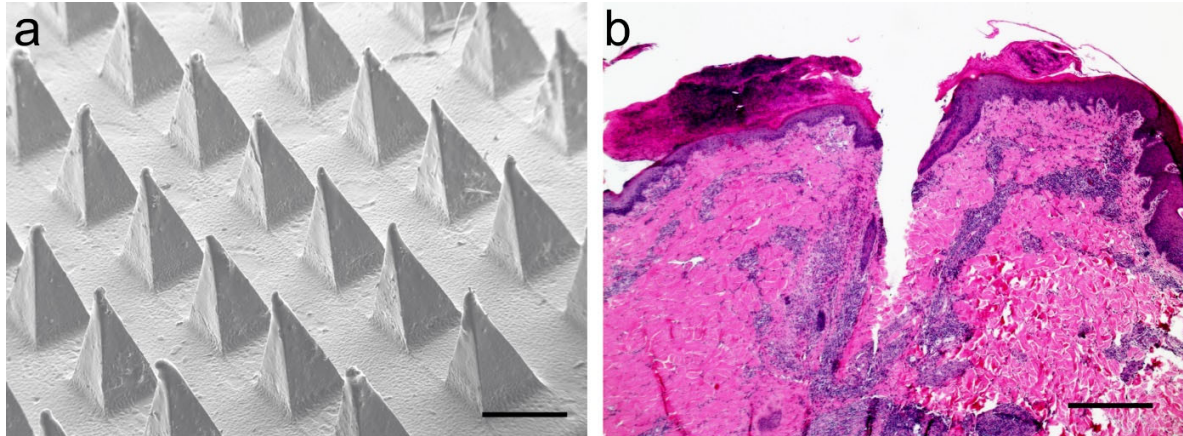

**Supplementary Figure 14.** (a) Representative SEM image of the MN array after removal from the skin. Scale bar: 500  $\mu\text{m}$ . (b) H&E-stained section indicates that insignificant fragments were found in the skin tissue after the removal of GR-MN. Scale bar: 200  $\mu\text{m}$ .

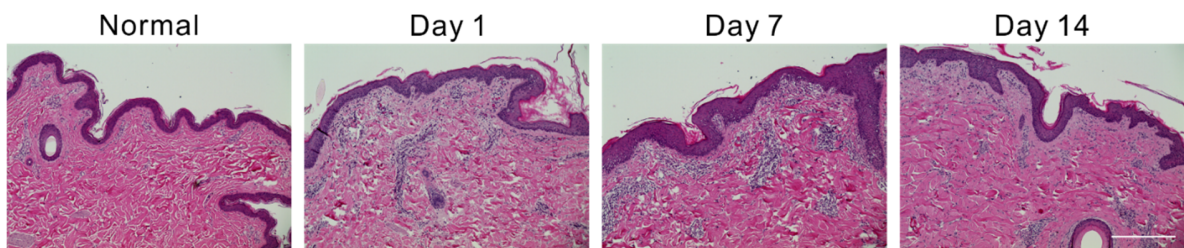

**Supplementary Figure 15.** H&E-stained sections of minipig skin pre- and post-treatment of GR-MN. Scale bar: 400  $\mu\text{m}$ .

**Supplementary Table 1.** Leachable monomers from the GR-MN patch with 20 × 20 array of microneedles.

| <b>Monomer</b> | <b>Leachable monomer amount (mg)</b> | <b>% per patch</b> |
|----------------|--------------------------------------|--------------------|
| NVP            | 0.082 ± 0.020                        | 0.24 ± 0.05        |
| DMAEA          | <0.001                               | <0.003             |
| 3APBA          | 0.055 ± 0.010                        | 0.16 ± 0.04        |
| EGDMA          | <0.020                               | <0.06              |

**Supplementary Table 2.** Pharmacokinetic parameters of insulin after administration of GR-MN (insulin dose: 0.5 mg), CR-MN (insulin dose: 0.5 mg), and subcutaneous injection (insulin dose: 0.05 mg) in diabetic mice. Data are presented as mean  $\pm$  s.d. ( $n=5$ ).

| <b>Group</b> | <b>AUC<sub>0→12</sub> (<math>\mu\text{IU h}^{-1} \text{mL}^{-1}</math>)</b> | <b>RBA (%)</b> |
|--------------|-----------------------------------------------------------------------------|----------------|
| GR-MN        | 3051.6 $\pm$ 429.9                                                          | 11.6 $\pm$ 1.9 |
| CR-MN        | 2966.2 $\pm$ 489.0                                                          | 11.9 $\pm$ 1.6 |
| SC insulin   | 2554.4 $\pm$ 376.1                                                          | 100            |

AUC<sub>0→12</sub>, area under the plasma insulin concentration over time; RBA, relative bioavailability compared with subcutaneous injection.

**Supplementary Table 3.** The plasma glucose levels (PGLs) of diabetic pigs.

| <b>PGL (mg/dL)</b><br><b>Time (h)</b> | <b>GR-MN</b> |          |          | <b>CR-MN</b> |          |          |
|---------------------------------------|--------------|----------|----------|--------------|----------|----------|
|                                       | <b>1</b>     | <b>2</b> | <b>3</b> | <b>1</b>     | <b>2</b> | <b>3</b> |
| 3                                     | 35           | 37       | 38       | 36           | 72       | 35       |
| 6                                     | 38           | 121      | 37       | 213          | 154      | 39       |
| 9                                     | 49           | 51       | 48       | 296          | 241      | 172      |
| 12                                    | 35           | 37       | 36       | 271          | 299      | 181      |
| 24                                    | 155          | 307      | 367      | 253          | 252      | 364      |

**Supplementary Table 4.** Gradient HPLC method for NVP, 3APBA and EGDMA.

| <b>Time (min)</b> | <b>Mobile phase A (%)</b> | <b>Mobile phase B (%)</b> | <b>Flow (mL/min)</b> |
|-------------------|---------------------------|---------------------------|----------------------|
| 0.00              | 95.0                      | 5.0                       | 0.3                  |
| 4.50              | 70.0                      | 30.0                      | 0.3                  |
| 5.50              | 70.0                      | 30.0                      | 0.3                  |
| 8.00              | 50.0                      | 50.0                      | 0.3                  |
| 8.10              | 5.0                       | 95.0                      | 0.3                  |
| 9.00              | 5.0                       | 95.0                      | 0.3                  |
| 9.10              | 95.0                      | 5.0                       | 0.3                  |

A: water with 0.1% formic acid (v/v)

B: acetonitrile with 0.1% formic acid (v/v)

Injection volume was set to 10  $\mu$ L.

**Supplementary Table 5.** Gradient HPLC method for DMAEA.

| <b>Time (min)</b> | <b>Mobile phase A (%)</b> | <b>Mobile phase B (%)</b> | <b>Mobile phase C (%)</b> | <b>Flow (mL/min)</b> |
|-------------------|---------------------------|---------------------------|---------------------------|----------------------|
| 0.00              | 0.0                       | 20.0                      | 80.0                      | 1.0                  |
| 2.00              | 0.0                       | 20.0                      | 80.0                      | 1.0                  |
| 12.00             | 25.0                      | 20.0                      | 55.0                      | 1.0                  |
| 15.00             | 25.0                      | 20.0                      | 55.0                      | 1.0                  |
| 15.10             | 0.0                       | 20.0                      | 80.0                      | 1.0                  |
| 22.00             | 0.0                       | 20.0                      | 80.0                      | 1.0                  |

A: acetonitrile

B: 50 mM perchloric acid

C: water

Injection volume was set to 10  $\mu$ L.
